# Supplementary material for: Amalaki rasayana, a traditional Indian drug enhances cardiac mitochondrial and contractile functions and improves cardiac function in rats with hypertrophy
Source: PubMed Central journal article supplement (PMC5561106; doi:10.1038/s41598-017-09225-x), 2017-08-17
Supplement: 41598_2017_9225_MOESM1_ESM.pdf [file 41598_2017_9225_MOESM1_ESM.pdf]

***Amalaki rasayana*, a traditional Indian drug enhances cardiac mitochondrial and contractile functions and improves cardiac function in rats with hypertrophy**

Vikas kumar<sup>1</sup>, Aneeshkumar A<sup>1</sup>, Kshemada K<sup>1</sup>, AjithKumar GS<sup>1</sup>, Binil Raj SS, Neha Deora<sup>3</sup>, Sanjay G<sup>2</sup>, Jaleel A<sup>1</sup>, MuraleedharanT.S<sup>4</sup>, Anandan E.M<sup>4</sup>, Mony R.S<sup>4</sup>, Valiathan MS<sup>5</sup>, Santhosh Kumar TR<sup>1</sup>, Kartha C.C<sup>1\*</sup>.

<sup>1</sup>Cardiovascular Diseases and Diabetes Biology, Rajiv Gandhi Centre for Biotechnology, Trivandrum, India

<sup>2</sup>Department of Cardiology, Sree Chitra Tirunal Institute for Medical Sciences & Technology, Trivandrum, India

<sup>3</sup>Centre for Bio-Separation Technology, Vellore Institute of Technology, Vellore, India

<sup>4</sup>Kottakal Arya Vaidyasala, Kottakkal, Kerala, India

<sup>5</sup>Manipal University, Manipal, Karnataka, India

**Contact information.** Dr. CC. Kartha, MD, Distinguished Professor, Cardiovascular and Diabetes Biology Group, Rajiv Gandhi Centre for Biotechnology, Thycaud Post, Poojappura, Trivandrum – 695014, INDIA

E. mail: [cckartha@rgcb.res.in](mailto:cckartha@rgcb.res.in)

Phone: +91-471-2529484

**Supplementary figure legends.**

**Supplementary Fig. S1. Characterization of AR preparation revealed the abundance of components which have biological importance in cardiovascular system. (a)** HPTLC profile of finished AR preparation. **(b)** RP-HPLC profile AR in ethanol. **(c)** RP-HPLC profile of AR in acetonitrile. **(d)** RP-HPLC profile of GH in ethanol. **(e)** RP-HPLC profile of GH in acetonitrile. **(f)** Pie diagram of whole components from AR (LC-MS followed by XCMS software analysis). **(g)** Comparison of viability of H9C2 cells treated with AR (dissolved in phosphate buffered saline). Percentage cell viability was calculated as Viable cells % = (OD of AR-treated cells/OD

of untreated (MTT + Isopropanol only) cells)  $\times 100$ . Values represent the mean  $\pm$  s.e.m. of data from three experiments.

**Supplementary Fig. S2. Summary of experimental design.** (a) After 4 weeks on synthetic chow diet for acclimatization, 3 months old rats had baseline echocardiography and were administered with AR (250, 500, 750mg/kg, orally/day) or GH (250, 500, 750mg/kg, orally/day) and control (untreated). After recording the 2<sup>nd</sup> and 3<sup>rd</sup> echo, animals were sacrificed. (b) After 4 weeks on synthetic chow diet for acclimatization, 3 months old rats had baseline echocardiography and ascending aorta was constricted for inducing left ventricular hypertrophy. After assessment of hypertrophy, rats were administered with AR (500 mg/kg, orally/day) or GH (500mg/kg, orally/day) and control. After 12 months of treatment, tissues were harvested.

**Supplementary figures are given below,**

**Supplementary Fig. S1**

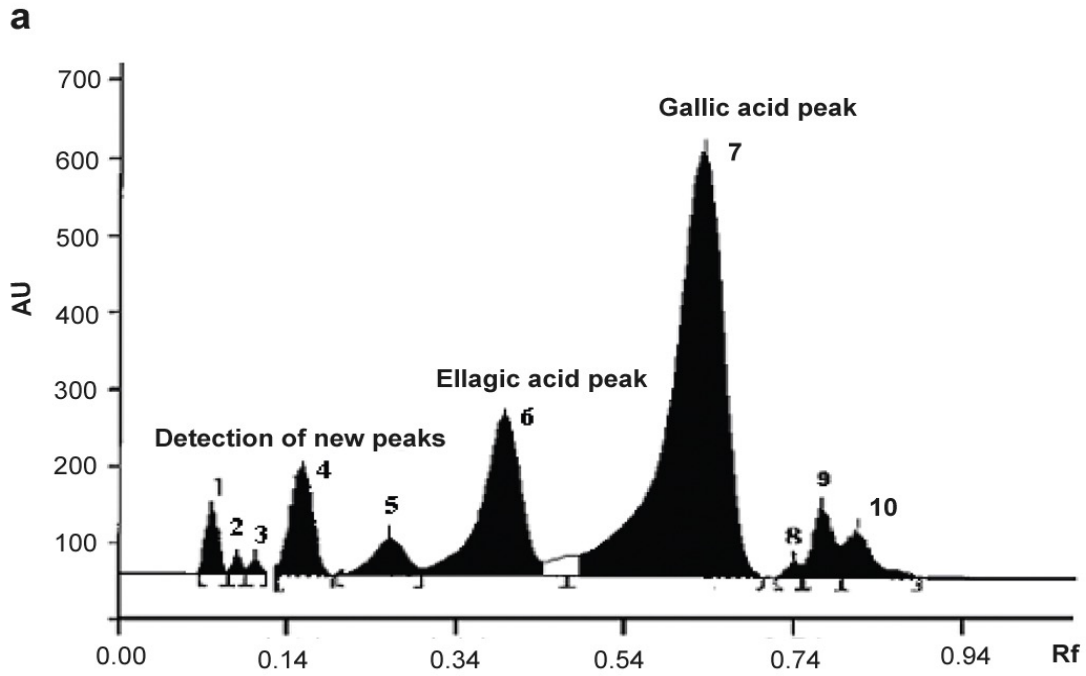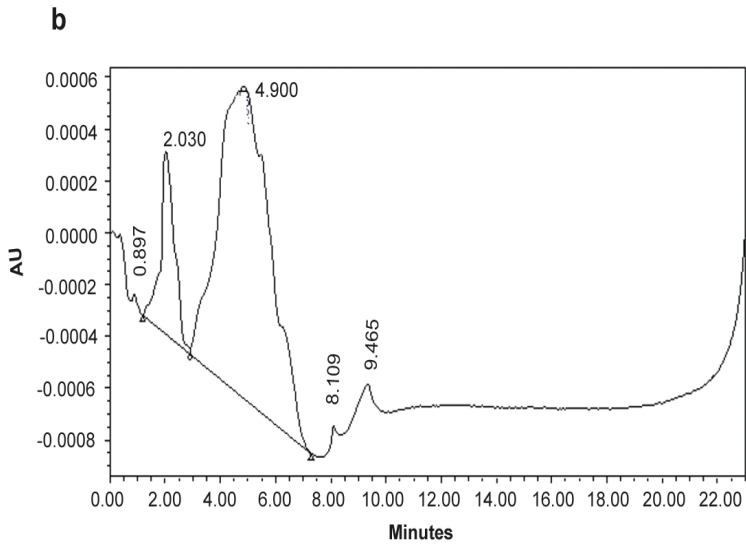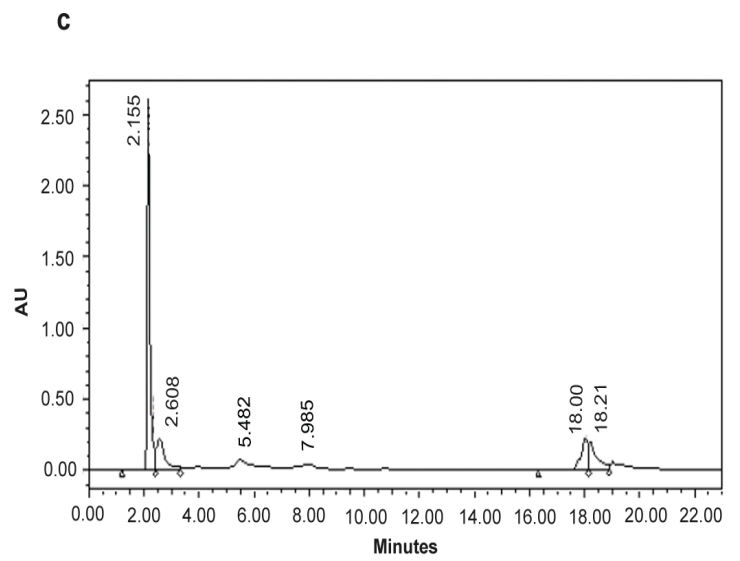

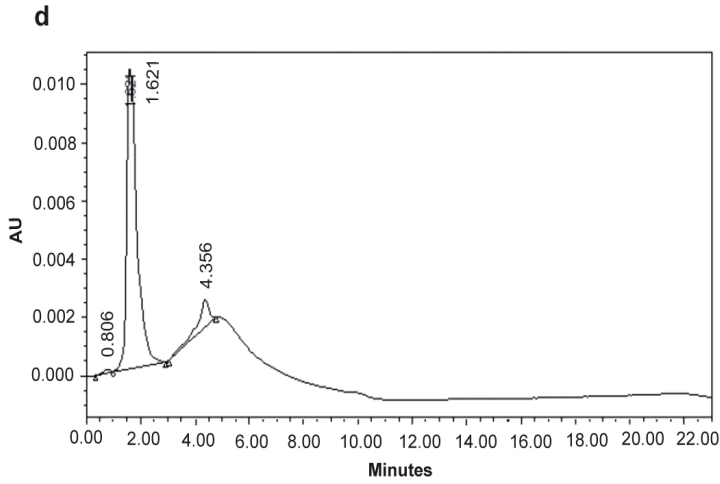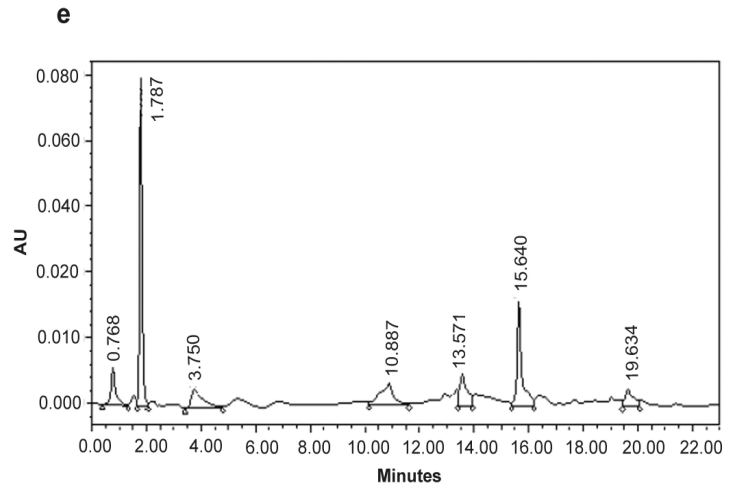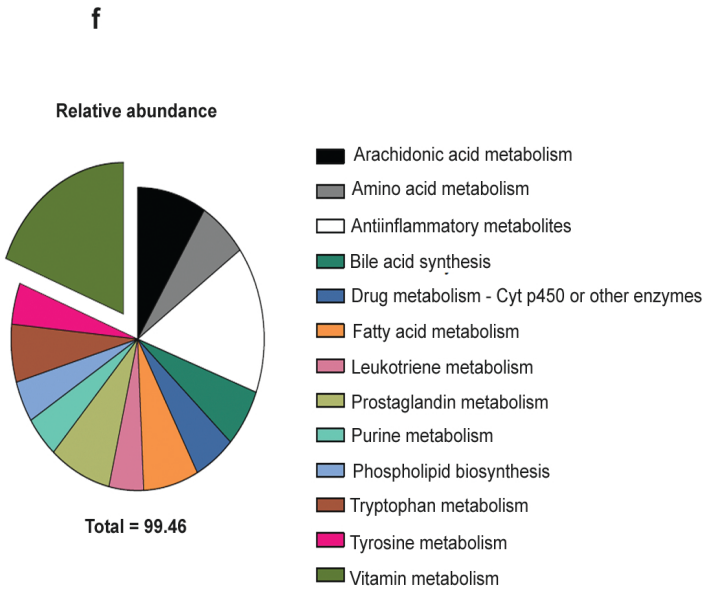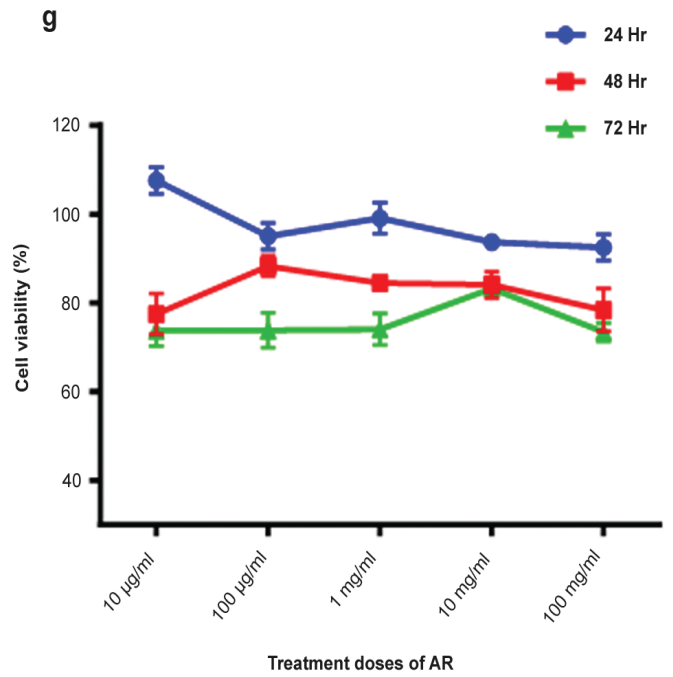

Supplementary Fig. S2

## Outline of experimental design

a

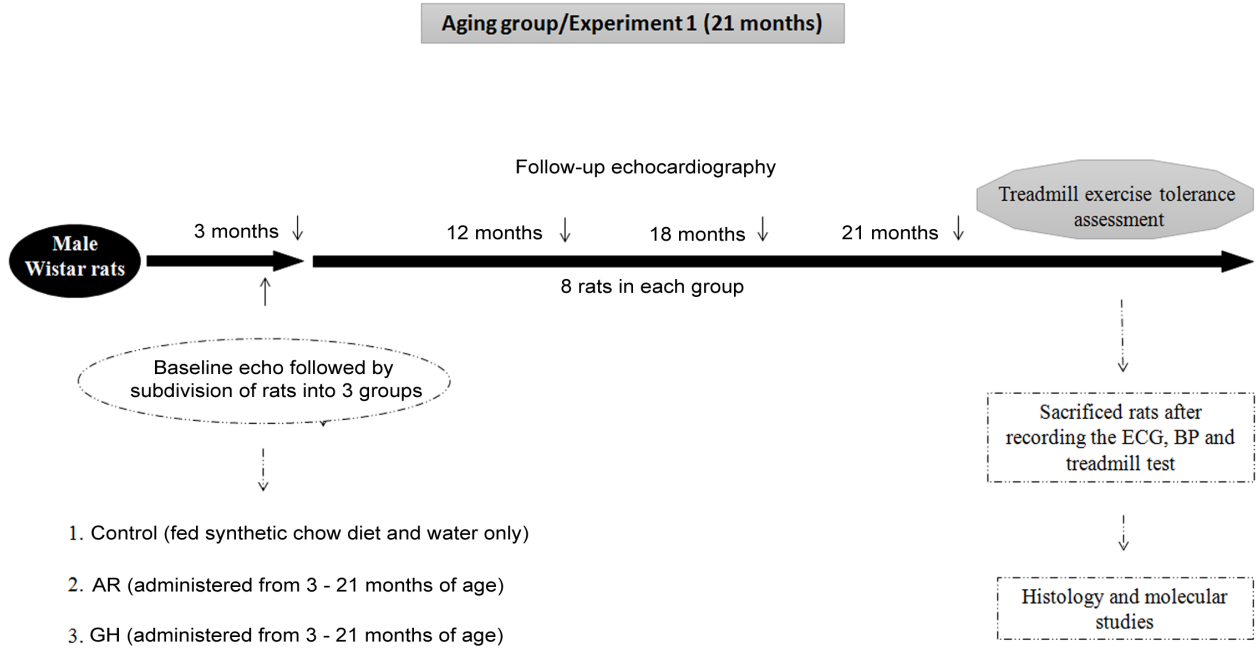

b

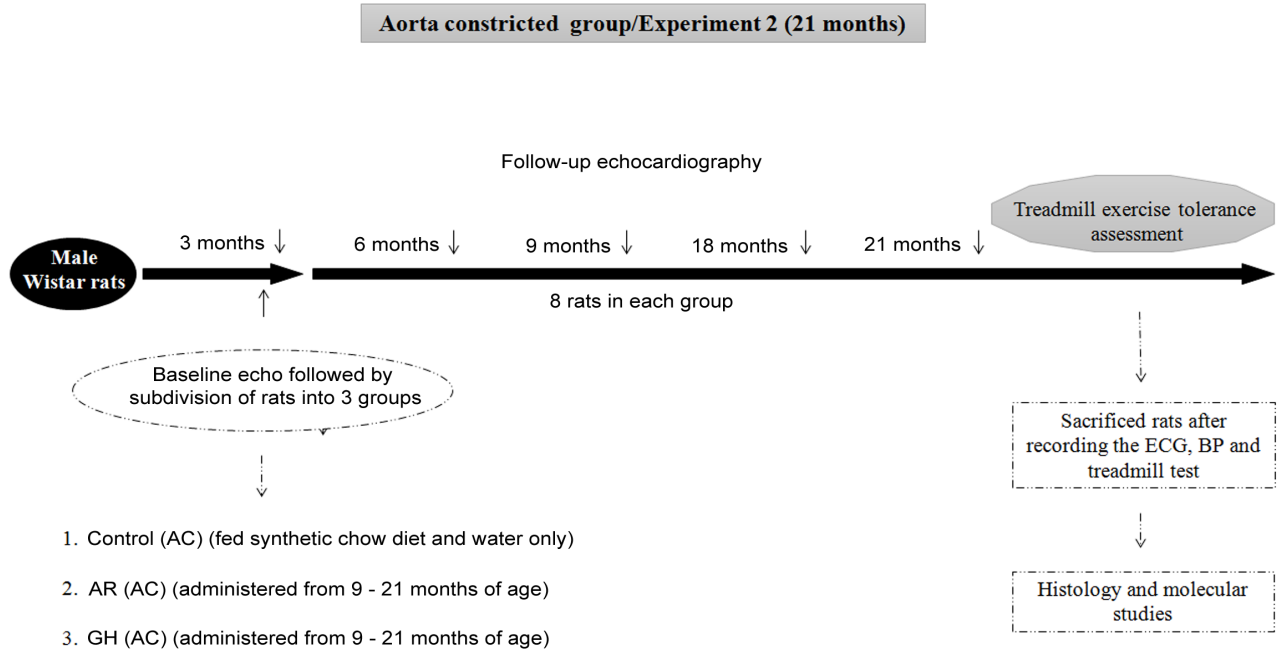

**List of supplementary tables.**

**Supplementary Table S1A.** Solubility analysis revealed good solubility of AR in acetonitrile and ethanol while moderate solubility in diethyl ether and methanol. GH had shown good solubility in diethyl ether while moderate solubility in other solvents.

| <b>Solvent</b> | <b>Amalaki rasayana/AR</b> | <b>GH</b> |
|----------------|----------------------------|-----------|
| Acetonitrile   | +++                        | ++        |
| Ethanol        | +++                        | ++        |
| Diethyl ether  | ++                         | +++       |
| Methanol       | ++                         | ++        |

(+++ Good solubility, ++ Moderate solubility)

**Supplementary Table S1B.** Details of solvent A and solvent B proportions used in HPLC analysis

| <b>Time (min.)</b> | <b>Solvent A (Water : Acetic acid)</b> | <b>Solvent B (Acetonitrile)</b> |
|--------------------|----------------------------------------|---------------------------------|
| 0                  | 88                                     | 12                              |
| 3                  | 88                                     | 12                              |
| 8                  | 70                                     | 30                              |
| 13                 | 45                                     | 55                              |
| 15                 | 40                                     | 60                              |
| 17                 | 10                                     | 90                              |
| 21                 | 10                                     | 90                              |
| 23                 | 88                                     | 12                              |

**Supplementary Table S1C.** Retention time from HPLC analysis revealed some common and unique peaks in AR when compared with GH.

| Peak   | GH      |              | Amalaki rasayana |              |
|--------|---------|--------------|------------------|--------------|
|        | Ethanol | Acetonitrile | Ethanol          | Acetonitrile |
| Peak 1 | 1.621   | 0.768        | 0.897            | 2.155        |
| Peak 2 | 4.356   | 1.787        | 2.030            | 2.568        |
| Peak 3 | -       | 3.750        | 4.900            | 5.482        |
| Peak 4 | -       | 10.887       | 8.109            | 7.985        |
| Peak 5 | -       | 13.571       | 9.465            | 18.026       |
| Peak 6 | -       | 15.640       | -                | 18.210       |
| Peak 7 | -       | 19.634       | -                | -            |

**Supplementary Table S2A.** Quantitative information of marker compound obtained from AR by HPTLC analysis

| S.No. | Sample                | Gallic acid (%w/w) | Ellagic acid (%w/w) |
|-------|-----------------------|--------------------|---------------------|
| 1     | Raw Amala             | 0.30               | 0.09                |
| 2     | Dried Amala powder    | 0.90               | 0.40                |
| 3     | Amalaki Rasayana (AR) | 1.5                | 0.40                |

**Supplementary Table S2B.** Quantitative information of unidentified new peaks (appearing during AR preparation) obtained from AR by HPTLC analysis

| S.No. | Sample                | Marker peak area (AU) |              | Unidentified peaks |                 | New peaks |                 |
|-------|-----------------------|-----------------------|--------------|--------------------|-----------------|-----------|-----------------|
|       |                       | Gallic acid           | Ellagic acid | No.                | Total area (AU) | No.       | Total area (AU) |
| 1     | Raw Amala             | 655.53                | 331.15       | 6                  | 1331.13         | Nil       | Nil             |
| 2     | Amala dry powder      | 683.96                | 214.20       | 6                  | 571.13          | Nil       | Nil             |
| 3     | Amalaki Rasayana (AR) | 675.53                | 320.12       | 4                  | 696.24          | 3         | 315.86          |



**Supplementary Table S3.** Comparisons of echocardiography parameters measured at repeated time intervals in aging group of rats.

| Parameter  | Control (N=8)               |                              |                              | AR (N=8)                    |                              |                              | GH (N=8)                    |                              |                              |
|------------|-----------------------------|------------------------------|------------------------------|-----------------------------|------------------------------|------------------------------|-----------------------------|------------------------------|------------------------------|
|            | 3 months<br>(mean±<br>s.d.) | 12 months<br>(mean±<br>s.d.) | 21 months<br>(mean±<br>s.d.) | 3 months<br>(mean±<br>s.d.) | 12 months<br>(mean±<br>s.d.) | 21 months<br>(mean±<br>s.d.) | 3 months<br>(mean±<br>s.d.) | 12 months<br>(mean±<br>s.d.) | 21 months<br>(mean±<br>s.d.) |
| IVSd (cm)  | 0.095±<br>0.011             | 0.124±<br>0.008              | 0.121±<br>0.014              | 0.115±<br>0.008             | 0.124±<br>0.009              | 0.122±<br>0.007              | 0.091±<br>0.006             | 0.128±<br>0.010              | 0.123±<br>0.003              |
| IVSs (cm)  | 0.238±<br>0.006             | 0.264±<br>0.018              | 0.220±<br>0.021              | 0.221±<br>0.024             | 0.234±<br>0.021              | 0.225±<br>0.013              | 0.208±<br>0.018             | 0.225±<br>0.013              | 0.234±<br>0.021              |
| LVIDd (cm) | 0.632±<br>0.056             | 0.661±<br>0.034              | 0.653±<br>0.055              | 0.681±<br>0.066             | 0.716±<br>0.058              | 0.752±<br>0.085              | 0.698±<br>0.092             | 0.731±<br>0.061              | 0.724±<br>0.038              |
| LVIDs (cm) | 0.360±<br>0.050             | 0.449±<br>0.043              | 0.446±<br>0.046              | 0.373±<br>0.052             | 0.422±<br>0.084              | 0.389±<br>0.059              | 0.419±<br>0.074             | 0.504±<br>0.033              | 0.489±<br>0.019              |
| LVPWd (cm) | 0.091±<br>0.001             | 0.119±<br>0.012              | 0.104±<br>0.003              | 0.114±<br>0.008             | 0.130±<br>0.013              | 0.125±<br>0.008              | 0.111±<br>0.004             | 0.125±<br>0.007              | 0.123±<br>0.003              |
| LVPWs (cm) | 0.201±<br>0.004             | 0.223±<br>0.023              | 0.210±<br>0.004              | 0.205±<br>0.025             | 0.236±<br>0.025              | 0.229±<br>0.026              | 0.213±<br>0.013             | 0.251±<br>0.017              | 0.256±<br>0.017              |
| LVFS (%)   | 43.12±<br>6.74              | 32.17±<br>5.65               | 32.57±<br>6.21               | 45.20±<br>4.26              | 41.10±<br>4.57               | 48.23±<br>8.90*              | 39.87±<br>7.26              | 31.02±<br>8.29               | 32.46±<br>2.96               |
| LVEF (%)   | 81.59±<br>6.70              | 68.79±<br>7.77               | 69.34±<br>8.52               | 83.54±<br>3.92              | 79.56±<br>11.07              | 86.84±<br>6.60*              | 85.15±<br>6.85              | 67.19±<br>10.78              | 69.20±<br>4.04               |

**Note:** \* indicates  $P < 0.05$ ; AR (3 - 21 months) versus GH / control (3 - 21 months), 2way ANOVA followed by multiple comparisons by Tukey's test.

**Supplementary Table S4.** Comparisons of echocardiography parameters measured at repeated time intervals in AC group of rats.

| Parameter  | Control (AC, N=8)    |                      |                       | AR (AC, N=8)         |                      |                       | GH (AC, N=8)         |                      |                       |
|------------|----------------------|----------------------|-----------------------|----------------------|----------------------|-----------------------|----------------------|----------------------|-----------------------|
|            | 3 months (mean±s.d.) | 9 months (mean±s.d.) | 21 months (mean±s.d.) | 3 months (mean±s.d.) | 9 months (mean±s.d.) | 21 months (mean±s.d.) | 3 months (mean±s.d.) | 9 months (mean±s.d.) | 21 months (mean±s.d.) |
| IVSd (cm)  | 0.085±0.006          | 0.141±0.01***        | 0.146±0.01            | 0.096±0.01           | 0.173±0.03***        | 0.138±0.01*           | 0.089±0.01           | 0.149±0.02***        | 0.132±0.01            |
| IVSs (cm)  | 0.187±0.018          | 0.283±0.01           | 0.329±0.01            | 0.191±0.02           | 0.291±0.04           | 0.283±0.02            | 0.164±0.01           | 0.329±0.03           | 0.351±0.02            |
| LVIDd (cm) | 0.691±0.110          | 0.520±0.07***        | 0.546±0.05            | 0.594±0.05           | 0.528±0.03***        | 0.641±0.07            | 0.597±0.07           | 0.510±0.06***        | 0.509±0.05            |
| LVIDs (cm) | 0.267±0.032          | 0.348±0.06***        | 0.381±0.05            | 0.310±0.04           | 0.356±0.04***        | 0.427±0.06            | 0.346±0.06           | 0.359±0.08           | 0.372±0.03            |
| LVPWd (cm) | 0.083±0.005          | 0.138±0.01***        | 0.147±0.01            | 0.102±0.01           | 0.165±0.03***        | 0.136±0.01*           | 0.090±0.01           | 0.152±0.02***        | 0.144±0.01            |
| LVPWs (cm) | 0.177±0.010          | 0.296±0.02           | 0.279±0.02            | 0.190±0.01           | 0.261±0.04           | 0.261±0.03            | 0.177±0.01           | 0.241±0.06           | 0.263±0.04            |
| LVFS (%)   | 61.03±3.88           | 32.88±7.46           | 30.42±4.85            | 47.95±4.43           | 32.66±6.39           | 33.57±5.49            | 42.37±3.42           | 29.41±9.47           | 26.49±6.41            |
| LVEF (%)   | 93.92±1.84           | 68.80±9.66           | 65.88±6.89            | 85.64±3.37           | 68.73±9.11           | 70.17±6.97            | 80.68±3.39           | 63.62±13.89          | 59.47±10.77           |

**Note:** \* indicates  $P<0.05$  and \*\*\* indicates  $P<0.001$ ; AR (AC, 9 - 21 months) versus GH / control (AC, 9 – 21 months), 2way ANOVA followed by multiple comparisons by Tukey’s test.

**Supplementary Table S5.** Quantification of trichrome stained heart sections of rats from aging and AC group of rats sacrificed at 21 months of age.

| Treatment groups |                       |                       |                                     | % change in D <sub>maj</sub> |              | % change in D <sub>min</sub> |              |
|------------------|-----------------------|-----------------------|-------------------------------------|------------------------------|--------------|------------------------------|--------------|
|                  | D <sub>maj</sub> (μm) | D <sub>min</sub> (μm) | D <sub>maj</sub> / D <sub>min</sub> | AR versus Control            | AR versus GH | AR versus Control            | AR versus GH |
| Control          | 82.25±2.52            | 19.90±1.50            | 4.13±0.19                           | ---                          | ---          | ---                          | ---          |
| AR 250           | 82.01±3.55            | 19.01±4.89            | 4.31±0.01                           | 0.29                         | 1.60         | 4.47                         | 5.38         |
| AR 500           | 80.01±1.91            | 17.02±1.98            | 4.70±0.24                           | 2.72                         | 3.66         | 14.47*                       | 14.94*       |
| AR 750           | 81.02±5.99            | 18.14±3.99            | 4.47±0.11                           | 1.50                         | 3.71         | 8.84*                        | 10.99*       |
| GH 250           | 83.34±8.70            | 20.09±1.52            | 4.15±0.28                           | ---                          | ---          | ---                          | ---          |
| GH 500           | 83.05±5.59            | 20.01±1.95            | 4.14±0.78                           | ---                          | ---          | ---                          | ---          |
| GH 750           | 84.14±6.62            | 20.38±2.90            | 4.13±0.17                           | ---                          | ---          | ---                          | ---          |
| Control (AC)     | 86.29±7.25            | 23.09±1.57            | 3.74±0.08                           | ---                          | ---          | ---                          | ---          |
| AR (AC)          | 81.99±6.93            | 19.10±2.27            | 4.29±0.16                           | 4.98*                        | 4.83*        | 17.28*                       | 16.88*       |
| GH (AC)          | 86.15±8.05            | 22.98±1.67            | 3.75±0.17                           | ---                          | ---          | ---                          | ---          |

**Note:** \* indicates  $P < 0.05$ ; AR versus GH / control and AR (AC) versus GH (AC)/ Control (AC) groups; analyzed by 2way ANOVA followed by multiple comparisons by Tukey's test.

**Supplementary Table S6.** NOAEL (No Observed Adverse Effect Level) of AR administered rats sacrificed at 21 months of age.

| Treatment groups | Heart (n=8)<br>(Mean±SD) |                               | Lung (n=8)<br>(Mean±SD) |                                   | Liver (n=8)<br>(Mean±SD) |                                    | Kidney (n=8)<br>(Mean±SD) |                                     | Body weight(n=8)<br>(Mean±SD) |
|------------------|--------------------------|-------------------------------|-------------------------|-----------------------------------|--------------------------|------------------------------------|---------------------------|-------------------------------------|-------------------------------|
|                  | Absolute weight (g)      | Relative weight (HW/BW, mg/g) | Absolute weight (g)     | Relative weight (Lung W/BW, mg/g) | Absolute weight (g)      | Relative weight (Liver W/BW, mg/g) | Absolute weight (g)       | Relative weight (Kidney W/BW, mg/g) | Absolute weight (g)           |
| Control          | 1.43±0.44                | 4.17±1.37 <sup>#</sup>        | 3.67±1.32               | 10.70±4.33                        | 8.22±1.14                | 23.96±5.04                         | 1.43±0.21                 | 4.17±0.64                           | 343±35.97                     |
| AR 250           | 1.63±0.26                | 3.62±0.71                     | 4.28±0.61               | 9.50±1.95                         | 12.41±1.70               | 27.53±1.31                         | 1.87±0.26                 | 4.15±0.50                           | 450.67±46.59                  |
| AR 500           | 1.44±0.10                | 3.15±0.46 <sup>#</sup>        | 4.66±0.55               | 10.18±1.07                        | 13.31±1.33               | 29.06±3.36                         | 1.75±0.20                 | 3.83±0.52                           | 458±16.82                     |
| AR 750           | 1.45±0.22                | 3.38±0.40                     | 4.18±0.42               | 10.08±1.57                        | 11.86±0.75               | 28.59±3.02                         | 1.61±0.05                 | 3.88±0.25                           | 414.77±35.21                  |
| GH 250           | 2.14±0.22                | 4.91±1.61                     | 4.63±1.53               | 10.64±3.62                        | 14.32±2.32               | 32.90±4.15                         | 1.89±0.37                 | 4.34±0.90                           | 435.2±22.58                   |
| GH 500           | 2.15±0.51                | 4.47±1.00 <sup>#</sup>        | 4.53±1.43               | 9.42±2.84                         | 12.72±3.11               | 26.46±6.13                         | 1.71±0.45                 | 3.56±0.89                           | 480.8±18.28                   |
| GH 750           | 2.04±0.26                | 5.02±0.69                     | 4.02±0.14               | 9.90±0.69                         | 12.99±1.08               | 32.00±2.31                         | 1.89±0.31                 | 4.66±0.79                           | 406±36.47                     |

**Note:** <sup>#</sup> indicates  $p=0.124$ ; AR-500 versus control group and  $p=0.176$ ; AR-500 versus GH-500 group; analyzed by 2way ANOVA followed by multiple comparisons by Tukey's test.

**Supplementary Table S7.** Comparison of function of AR with Western medicines.

| <b>S. No.</b> | <b>Compound</b>             | <b>Function</b>                                                                                                                                                                                                                                                    |
|---------------|-----------------------------|--------------------------------------------------------------------------------------------------------------------------------------------------------------------------------------------------------------------------------------------------------------------|
| 1.            | Amalaki rasayana (AR)       | Improve cardiac function, exercise tolerance, muscle contractility<br>Increase mitochondrial bioenergetics (fatty acid metabolism)<br>Activate adrenergic receptors / Sympathomimetic activity<br>Increase autophagy and level of antioxidant enzymes in aged rats |
| 2.            | Digoxin <sup>1</sup>        | Improve cardiac function (Increase ejection fraction, cardiac output)<br>Sympathomimetic activity                                                                                                                                                                  |
| 3.            | Nor-adrenaline <sup>2</sup> | Activate adrenergic receptor and downstream signaling<br>Improve cardiac function and muscle contraction<br>Increase fatty acid metabolism                                                                                                                         |
| 4.            | Carnitine <sup>3</sup>      | Increase fatty acid metabolism and exercise tolerance in aged rats                                                                                                                                                                                                 |
| 5.            | CoQ <sup>4</sup>            | Antioxidant<br>Increase myocardial bioenergetics<br>Improve exercise tolerance in aged rats                                                                                                                                                                        |

**Note:** <sup>1</sup>Reference 49, <sup>2</sup>Reference 17, <sup>3</sup>Reference 50, <sup>4</sup>Reference 51 in the manuscript.

**Supplementary table S8.** Composition of Ghee used in AR.

| <b>Sr. No.</b> | <b>Composition of Ghee</b> | <b>Quantity (per ml)</b> |
|----------------|----------------------------|--------------------------|
| 1.             | Energy                     | 8 Calorie                |
| 2.             | Total fat                  | 1 g                      |
| 3.             | Saturated fat              | 1 g                      |
| 4.             | Polyunsaturated            | 0 g                      |
| 5.             | Monounsaturated            | 0 g                      |
| 6.             | Trans                      | 0 g                      |
| 7.             | Cholesterol                | 2 mg                     |
| 8.             | Sodium                     | 0 mg                     |
| 9.             | Potassium                  | 0 mg                     |
| 10.            | Total carbohydrates        | 0 g                      |
| 11.            | Dietary fibers             | 0 g                      |
| 12.            | Sugars                     | 0 g                      |
| 13.            | Protein                    | 0 g                      |
| 14.            | Vitamin A                  | 0 %                      |
| 15.            | Vitamin C                  | 0 %                      |
| 16.            | Calcium                    | 0 %                      |
| 17.            | Iron                       | 0 %                      |

**Supplementary Table S9.** Details of primers used in qRT-PCR experiments.

| <b>Serial #</b> | <b>Gene</b>   | <b>Primer Sequence</b>                                                                         |
|-----------------|---------------|------------------------------------------------------------------------------------------------|
| <b>1</b>        | <b>GAPDH</b>  | Forward primer: 5'-CCATGTTTGTGATGGGTGTG-3'<br>Reverse primer: 5'-ACAGTCTTCTGAGTGGCAGTGA-3'     |
| <b>2</b>        | <b>BNP</b>    | Forward primer: 5'-AACAATCCACGATGCAGAAG-3'<br>Reverse primer: 5'-GTGCCATCTTGGAATTTTCG-3'       |
| <b>3</b>        | <b>SERCA2</b> | Forward primer: 5'-TTCGAAGTCTGCCTTCTGTG-3'<br>Reverse primer: 5'-CTCCAATGGGTGCATAGGTT-3'       |
| <b>4</b>        | <b>Atp1a1</b> | Forward primer: 5'-GAAAGGGACATGGACGAACT-3'<br>Reverse primer: 5'-CCGACAGAATTTGACCCACT-3'       |
| <b>5</b>        | <b>TERT</b>   | Forward primer: 5'-CCAGCGTGCATAGCTACTTG-3'<br>Reverse primer: 5'-TGGCACAAATTTGGTACAGG-3'       |
| <b>6</b>        | <b>TERF1</b>  | Forward primer: 5'-TGTAGCTGTGTGTATGGAAATGG-3'<br>Reverse primer: 5'-AATTTTCTTTCTAAAGGCGTGTA-3' |
| <b>7</b>        | <b>COL1a2</b> | Forward primer: 5'-TTGACCCTAACCAAGGATGC-3'<br>Reverse primer: 5'-CACCCCTTCTGCGTTGTATT-3'       |
| <b>8</b>        | <b>PLN</b>    | Forward primer: 5'-ACCTTACTCGCTCGGCTATC-3'<br>Reverse primer: 5'-GCAGATCAGCAGCAGACATA-3'       |
| <b>9</b>        | <b>CAT</b>    | Forward primer: 5'-GAGAGCGGATTCCTGAGAGA-3'<br>Reverse primer: 5'-GAGGGTCACGAACTGTGTCA-3'       |
| <b>10</b>       | <b>GPX1</b>   | Forward primer: 5'-CACCGAAATGAATGATCTGC-3'<br>Reverse primer: 5'-GAGCCTTCTCACCATTACC-3'        |

|           |                |                                                                                           |
|-----------|----------------|-------------------------------------------------------------------------------------------|
| <b>11</b> | <b>SOD2</b>    | Forward primer: 5'-AACCCAAAGGAGAGTTGCTG-3'<br>Reverse primer: 5'-ATAAGGCCTGTGGTTCCTTG-3'  |
| <b>12</b> | <b>SOD1</b>    | Forward primer: 5'-ACACAAGGCTGTACCACTGC-3'<br>Reverse primer: 5'-CACCATAGTACGGCCAATGA-3'  |
| <b>13</b> | <b>p53</b>     | Forward primer: 5'-GTTCCGAGAGCTGAATGAGG-3'<br>Reverse primer: 5'-GCCCCACTTTCTTGATCATT-3'  |
| <b>14</b> | <b>ADRB1</b>   | Forward primer: 5'-ACGTCACCAACCTCTTCAT-3'<br>Reverse primer: 5'-ACATAGCACGTCTACCGAAGC-3'  |
| <b>15</b> | <b>ADRB2</b>   | Forward primer: 5'-TTGGCGTGTGCTGATCTAGT-3'<br>Reverse primer: 5'-TAGCGATCCACTGCAATCAC-3'  |
| <b>16</b> | <b>CACNA1S</b> | Forward primer: 5'-TCCTCAACTCCATCTTCAAGG-3'<br>Reverse primer: 5'-ACGATGTCTGTCCCAATGAA-3' |



**Supplementary table S10.** Details of antibodies used in Western blot experiments.

|                                          |                |
|------------------------------------------|----------------|
| Rabbit monoclonal anti- $\beta$ Tubulin  | Cell signaling |
| Mouse monoclonal anti-SERCA2             | Cell signaling |
| Goat polyclonal anti-BNP                 | Santa Cruz     |
| Mouse monoclonal anti-cardiac Troponin T | Abcam          |
| Goat polyclonal anti – CREB-1            | Santa Cruz     |
| Rabbit polyclonal anti – pCREB-1         | Santa Cruz     |
| Rabbit polyclonal anti – pAMPK           | Cell signaling |
| Rabbit polyclonal anti – AMPK            | Cell signaling |
| Rabbit polyclonal anti – Beclin-1        | Santa Cruz     |
| Rabbit polyclonal anti – p62             | Santa Cruz     |
| Rabbit polyclonal anti – LC3             | Santa Cruz     |
| Mouse monoclonal anti- p53               | Abcam          |
| Mouse monoclonal anti- ATP5a1            | Cell signaling |
| Rabbit polyclonal anti – COXIV           | Cell signaling |
| Rabbit polyclonal anti – SDHA            | Cell signaling |
| Rabbit polyclonal anti – SOD2            | Cell signaling |
